# Supplementary figures and images for: Biomarkers of Castrate Resistance in Prostate Cancer: Androgen Receptor Amplification and T877A Mutation Detection by Multiplex Droplet Digital PCR
Source: MDPI journal article supplement (doi:10.3390/jcm11010257), 2022-01-04

Figure S1.

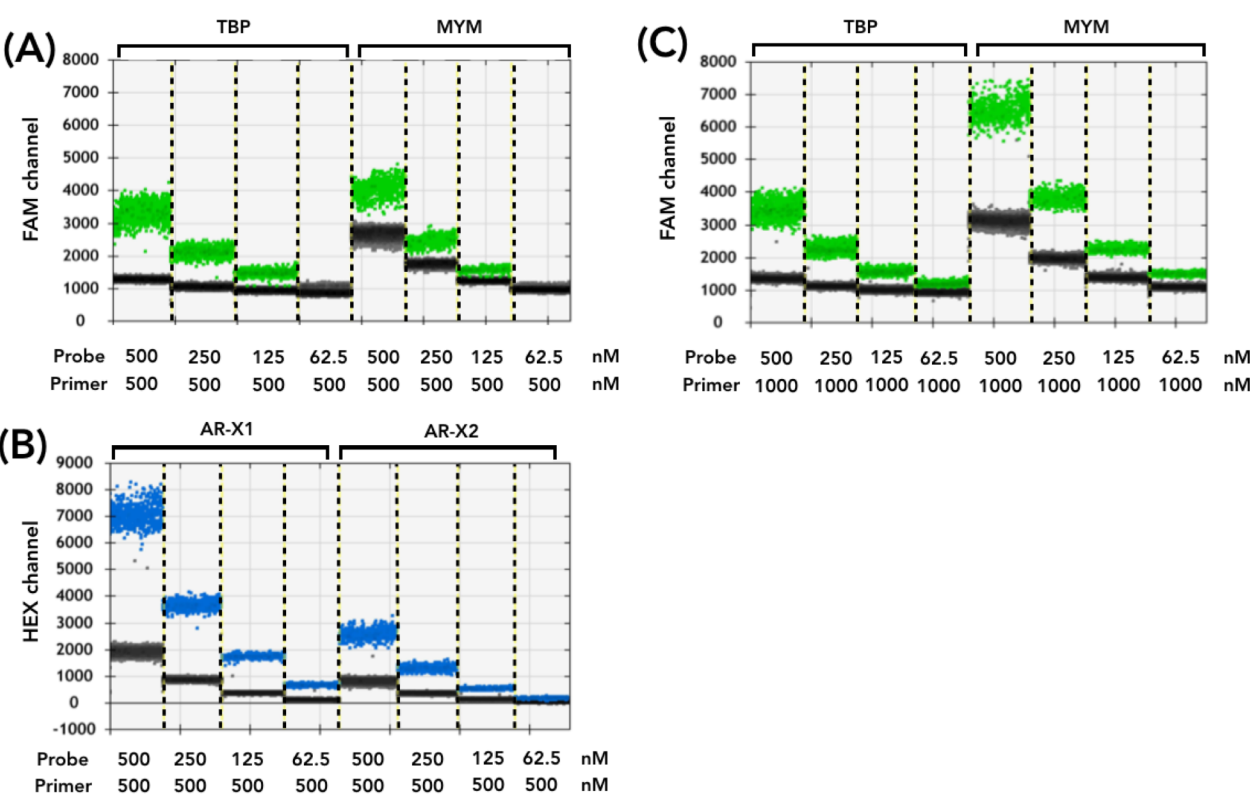

Figure S2.

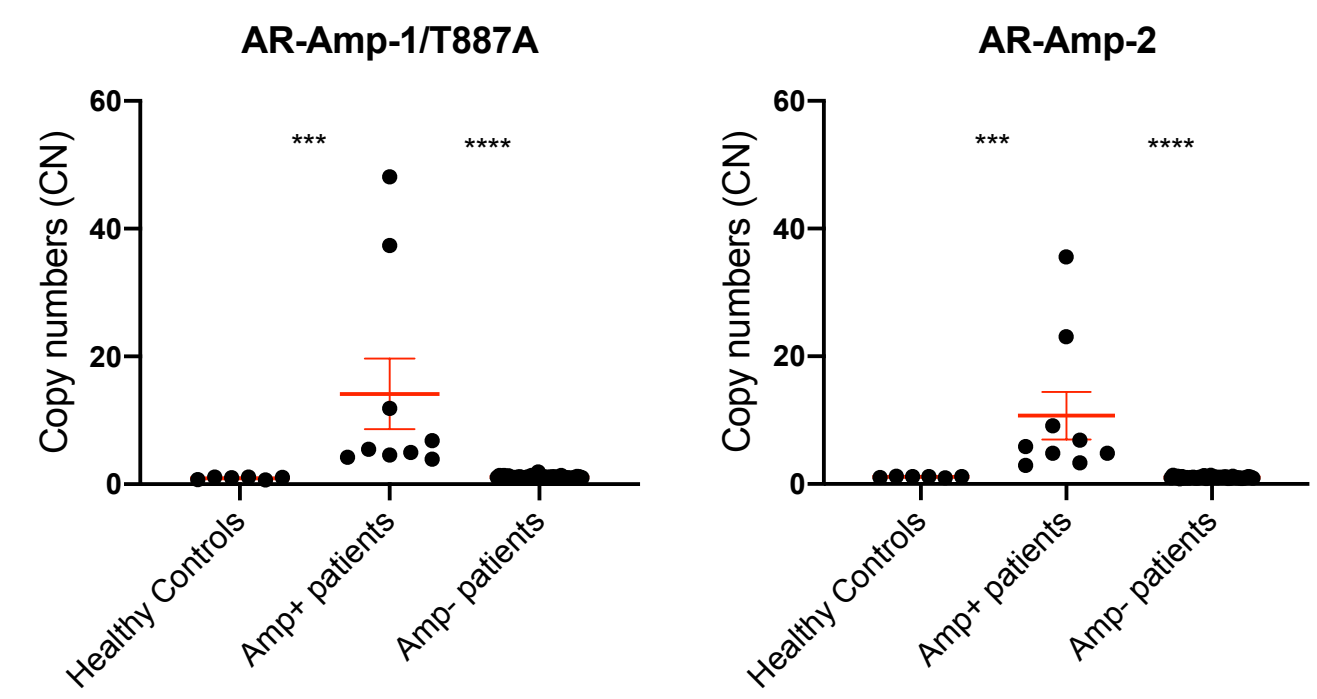

Supplement: s1 [file s1]
